# Supplementary material for: Structural and cellular mechanisms of peptidyl-prolyl isomerase Pin1-mediated enhancement of Tissue Factor gene expression, protein half-life, and pro-coagulant activity
Source: PubMed Central journal article supplement — Haematologica. 2018 Mar 15;103(6):1073–82. doi: 10.3324/haematol.2017.183087 (PMC6058786; doi:10.3324/haematol.2017.183087), 2018-06
Supplement: 2017.183087.KURAKULA_SUPPL.pdf [file 2017.183087.KURAKULA_SUPPL.pdf]

## Structural and cellular mechanisms of peptidyl-prolyl isomerase Pin1-mediated enhancement of Tissue Factor gene expression, protein half-life, and pro-coagulant activity

Kondababu Kurakula,<sup>1,2,\*</sup> Duco S. Koenis,<sup>1,\*</sup> Mark A. Herzik Jr,<sup>3,4</sup> Yanyun Liu,<sup>3</sup> John W. Craft Jr,<sup>3</sup> Pieter B. van Loenen,<sup>1</sup> Mariska Vos,<sup>1</sup> M. Khang Tran,<sup>1</sup> Henri H. Versteeg,<sup>5</sup> Marie-José T.H. Goumans,<sup>2</sup> Wolfram Ruf,<sup>6,7</sup> Carlie J.M. de Vries<sup>1,#</sup> and Mehmet Şen<sup>3,#</sup>

<sup>1</sup>Department of Medical Biochemistry, Amsterdam Cardiovascular Sciences, Academic Medical Center, University of Amsterdam, the Netherlands; <sup>2</sup>Department of Cell and Chemical Biology, Leiden University Medical Center, the Netherlands; <sup>3</sup>Department of Biology and Biochemistry, Chemical Biology Interdisciplinary Program, University of Houston, TX, USA; <sup>4</sup>Department of Integrative Structural and Computational Biology, The Scripps Research Institute, La Jolla, CA, USA; <sup>5</sup>The Einthoven Laboratory for Experimental Vascular Medicine, Leiden University Medical Center, the Netherlands; <sup>6</sup>Center for Thrombosis and Hemostasis, University Medical Center, Mainz, Germany and <sup>7</sup>Department of Immunology and Microbial Science, The Scripps Research Institute, La Jolla, CA, USA

\*KK and DSK contributed equally to this work. #CJMdV and MS contributed equally to this work.

©2018 Ferrata Storti Foundation. This is an open-access paper. doi:10.3324/haematol.2017.183087

Received: October 23, 2017.

Accepted: March 1, 2018.

Pre-published: March 15, 2018.

Correspondence: c.j.devries@amc.nl or msen@uh.edu

## **SUPPLEMENTAL METHODS**

### **Cell culture**

HUVECs were used at passages 1-3 and cultured in M199 medium (Invitrogen) supplemented with 20% fetal calf serum (FCS; Gibco), endothelial cell growth supplement (Sigma), 100U/mL penicillin, 100µg/mL streptomycin, 2mM L-glutamine (all Gibco), and heparin (Invitrogen). Human SMCs were cultured in M199 medium supplemented with 10% FCS, 100U/mL penicillin, and 100µg/mL streptomycin. Mouse aortic SMCs from wild-type mice and TF<sup>ΔCD</sup> mice were obtained after collagenase digestion and cultured in DMEM/F12 medium supplemented with penicillin/streptomycin and 20% FCS. Human SMCs were used at passages 5-7 and mouse SMCs at passages 8-10. SMCs were characterized by SM α-actin (1A4; DAKO) showing uniform fibrillar staining. HEK293T and EC-RF24 cells were cultured in Dulbecco's modified Eagle's medium (DMEM) containing 20mM glucose and supplemented with 10% FCS, 100U/mL penicillin, and 100µg/mL streptomycin.

### **Reverse transcription-quantitative PCR**

RNA was isolated using the Aurum Total RNA kit (BioRad). RNA was reverse transcribed into cDNA using the iScript cDNA synthesis kit (BioRad). Quantitative polymerase chain reaction (qPCR) was performed using SYBR Green master mix (BioRad) and the MyIQ system (BioRad). Sequences of primers used are shown in Table S2.

### **Western blotting**

Cells were lysed in NP-40 lysis buffer (50mM Tris-HCl, pH7.4, 100mM NaCl, 10% glycerol, 1% NP-40) supplemented with phosphatase inhibitors (10mM NaF, 1mM Na<sub>3</sub>VO<sub>4</sub>) and Complete protease inhibitor cocktail (Roche). Protein samples were separated on 12% SDS-PAGE gels and transferred onto Nitrocellulose membranes (Millipore). Membranes were blocked using LicorBlock (Licor Biosciences) and incubated with appropriate primary antibodies and near-infrared dye conjugated secondary antibodies, followed by scanning using the Odyssey Imaging System (Licor Biosciences). Antibodies used in this study include Mouse-anti-HA (Roche; cat#11583816001), Rabbit-anti-human Tissue Factor (American Diagnostica; cat#4502), Rabbit-anti-Pin1 (Cell Signaling; cat#3722), Mouse-anti-GFP (Santa Cruz; cat#sc-9996), and Mouse-anti-α-Tubulin (Cedarlane; cat#CLT9002).

### **Co-immunoprecipitation assays**

HEK293T cells were co-transfected with plasmids encoding HA-tagged Pin1, full-length Tissue Factor, or mutant Tissue Factor constructs and incubated for 48h. Cells were lysed in NP-40 lysis buffer and lysates were pre-cleared for 1h at 4°C with protein A-Sepharose (GE Healthcare), followed by incubation overnight with 2µg of the indicated pulldown antibody and protein A-Sepharose. Immunoprecipitates were washed three times in NP-40 lysis buffer, eluted by boiling in Laemmli sample buffer, and detected by Western blotting.

### **TFCD peptide pull-down assays**

HEK293T cells were transfected with plasmids encoding either Pin1, Pin1 mutants, or GFP. After 24 h, transfected cells were washed with PBS and lysed in NP-40 lysis buffer supplemented with phosphatase inhibitors (10mM NaF, 1mM Na<sub>3</sub>VO<sub>4</sub>) and Complete protease inhibitor cocktail. Pull-downs were performed using either biotinylated peptides encoding the human TFCD from Ser241 to Ser263 (SLHKCRKAGVGQSWKENSPLNVS; PepScan), or cysteine-coupled peptides encoding the human TFCD from Cys245 to Ser263 (CRKAGVGQSWKENSPLNVS; synthesized at the core facility of The Scripps Research Institute, La Jolla, California). For biotinylated peptide pull-downs, 20µg of peptide was added to Avidin Agarose pre-cleared whole cell lysates and samples were incubated overnight at 4°C on a rotor. The next day, peptide-protein complexes were pulled down by incubating samples for 2h at 4°C with 20 µL 50% Avidin Agarose slurry that was pre-blocked overnight at 4°C with 5%(w/v) BSA. Precipitates were washed three times with NP-40 lysis buffer and bound proteins were eluted by boiling in Laemmli sample buffer. For cysteine-coupled TFCD peptide pull-downs, peptides dissolved in Coupling Buffer (50mM Tris-HCl, pH 8.0, 5mM EDTA) were reduced by incubating for 10 minutes with 25mM tris(2-carboxyethyl)phosphine (TCEP; Pierce) and subsequently coupled to SulfoLink resin (Pierce) by incubating for 45 minutes under gentle agitation. Resin-peptide complexes were washed three times with Coupling Buffer to remove unbound peptide and subsequently blocked by incubating overnight at 4°C with 5%(w/v) BSA. The next day, 1 mg of whole

cell lysate was pre-cleared by adding 20  $\mu$ L 50% SulfoLink resin and incubating for 1h at 4°C on a rotor. Blocked resin-peptide complexes were added to pre-cleared whole cell lysates and incubated overnight at 4°C. Precipitates were washed three times with 0.1% Triton X-100 in Coupling Buffer and bound proteins were eluted by boiling in Laemmli sample buffer. Pulled down proteins were detected by Western blotting. Biotinylated peptides were detected using IRDye 800CW-conjugated Streptavidin (Licor Biosciences).

## Nuclear magnetic resonance (NMR) spectroscopy

### *Pin1 WW-domain protein and TFCD peptide preparation*

A cDNA construct encoding the WW-domain of human Pin1 fused to an N-terminal glutathione S-transferase (GST) tag was kindly provided by Dr. Jeffrey Kelly (The Scripps Research Institute). The construct was transformed into BL21 (DE3) cells cultured in M9 minimal media containing 1 g/L  $(^{15}\text{NH}_4)_2\text{SO}_4$  and  $^{15}\text{NH}_4\text{Cl}$  and 2.5 g/L  $^{13}\text{C}$ -D-glucose. Cell cultures were grown in a high-speed shaker at 37°C to an  $\text{OD}_{600}$  of 0.5 and GST-Pin1 WW-domain expression was induced with 0.5mM isopropyl  $\beta$ -D-1-thiogalactopyranoside (IPTG). Cells were lysed in PBS, centrifuged at 10,000  $\times g$  for 30 minutes at 4°C, and passed through a 0.45  $\mu$ m filter. Filtered lysate was loaded onto a GST column at ambient temperature. After washing the GST-column with PBS, GST-fused protein was eluted using 10mM reduced glutathione in PBS. 1 mg of GST-Pin1 WW-domain was cleaved by 1 unit of thrombin protease at ambient temperature for 16 hours. The cleaved Pin1 WW-domain was purified away from the GST-tag by a reverse-phase HPLC C4-column using increasing concentrations of acetonitrile in the mobile phase and then freeze-dried. Peptides corresponding to the human TFCD from residues Cys245 to Ser263 in either unphosphorylated, Ser253 or Ser258 phosphorylated, or double Ser253/Ser258 phosphorylated states were synthesized at the core facility of The Scripps Research Institute, La Jolla, California.

### *NMR titration of pS253/pS258 TFCD against Pin1 WW-domain*

NMR experiments were performed on Bruker DRX 600 MHz and 800 MHz spectrometers equipped with triple resonance  $^1\text{H}/^{13}\text{C}/^{15}\text{N}$  optimized for proton detection at 300K. Acquired data were converted from Bruker XWINNMR format to NMRVIEW version 5.3 format using NMRpipe software<sup>1-2</sup>. All spectra were analyzed using NMRVIEW. All experiments were performed at the UH NMR Facility at the University of Houston.

Pin1 WW-domain/TFCD titrations were performed by step-wise increases in the amount of double phosphorylated TFCD. TFCD phosphorylated peptide with an initial concentration of 21mM was added into a 250  $\mu$ M sample of  $^1\text{H}/^{15}\text{N}$  labeled Pin1 WW-domain in 10mM Tris (pH 6.3), 100mM NaCl, 5%(v/v)  $\text{D}_2\text{O}/\text{H}_2\text{O}$  to give molar ratios ranging from 1:0 to 1:10. For each titration point, the pH of the sample was adjusted to 6.3 if required. Two dimensional  $^1\text{H}/^{15}\text{N}$  heteronuclear single-quantum correlation (HSQC) spectra were acquired with 2048 and 256 complex points in  $t_1$  and  $t_2$  respectively with 16 transient numbers of scans per increment. The binding constant for the double phosphorylated TFCD was calculated by non-linear regression using the following equation:

$$2 \times \frac{\Delta\delta}{\Delta\delta_{\max}} = \left( 1 + \frac{[\text{TFCD}]}{[\text{WW}]} + \frac{K_d}{[\text{WW}]} \right) - \left[ \left( 1 + \frac{[\text{TFCD}]}{[\text{WW}]} + \frac{K_d}{[\text{WW}]} \right)^2 - 4 \times \frac{[\text{TFCD}]}{[\text{WW}]} \right]^{1/2}$$

Where  $\Delta\delta$  is the observed chemical shift,  $\Delta\delta_{\max}$  is the maximum chemical shift,  $K_d$  is the dissociation constant, [TFCD] is concentration of double phosphorylated TFCD, and [WW] is the concentration of the Pin1 WW-domain.

### *NMR structure determination*

A 5 mm Shigemi microcell was used for each NMR sample. Backbone assignments were obtained by through-bond triple resonance methods of HNCA, HN(CO)CA, HNCACB, CBCA(CO)NH, HNCO and HN(CA)CO<sup>3</sup>. Chemical shift index, the CN-NOESY, HCCH-TOCSY, HCCH-COSY, and aromatic  $^{13}\text{C}$ -edited HSQC were used to determine the interproton distances as well as  $\psi$ ,  $\phi$  and  $\chi_1$  torsion angles<sup>4-7</sup>. Based on the peak volumes, the nuclear Overhauser effects (NOEs) were categorized into four distances - 2.7 Å, 3.5 Å, 5.0 Å, and 6 Å, respectively. Structure calculations were performed using the simulated annealing program, AMBER. In the final round of calculation, the 20 lowest energy structures were selected. Statistics for the accepted structures and structural restraints used for

calculation are listed in Table S1. PROCHECK\_NMR was used to analyze the quality of the refined structures<sup>8</sup>.

#### *Pin1 WW-pS253/pS258 TFCD structure energy minimization*

Energy minimization was performed on each model of the *Pin1 WW-pS253/pS258 TFCD* complex with Amber force field with the GROMACS 4.6.7 program<sup>9-10</sup> to remove possible steric clashes and minimize the potential energy of the system on the UH CACDS super-computing cluster. An Amber99sb force field was compiled to add the parameters for phosphorylated Ser253 and Ser258 residue types. Each conformer was solvated inside a cubic box of explicit solvent model (TIP3P) with at least 10 Å from the water box edge. Three sodium ions were added to neutralize the system. Each system contained about 32,000 atoms and Periodic Boundary Conditions were employed. All structures of *Pin1 WW-pS253/pS258 TFCD* complex underwent a series of step-wise energy minimization using the steepest descent method. Step-wise energy minimization was performed as follows: (1) *Pin1 WW-pS253/pS258 TFCD* complex was constrained while water and ions moved freely; (2) heavy atoms of complex were constrained, while water, ions, and hydrogens moved freely; (3) atoms of the complex main chain were constrained, while the rest of the system moved freely; (4) the entire system was subjected to an unconstrained energy minimization. Total energy minimization was carried out until the system converged to the maximum atomic force <100 kJ mol<sup>-1</sup> nm<sup>-1</sup>.

### **SUPPLEMENTAL REFERENCES**

1. Johnson BA. Using NMRView to visualize and analyze the NMR spectra of macromolecules. *Methods Mol Biol.* 2004;278:313-352.
2. Delaglio F, Grzesiek S, Vuister GW, Zhu G, Pfeifer J, Bax A. NMRPipe: a multidimensional spectral processing system based on UNIX pipes. *Journal of biomolecular NMR.* 1995;6(3):277-293.
3. Grzesiek S, Bax A. Amino acid type determination in the sequential assignment procedure of uniformly <sup>13</sup>C/<sup>15</sup>N-enriched proteins. *Journal of biomolecular NMR.* 1993;3(2):185-204.
4. Vuister GW, Bax A. Measurement of two-bond JCOH alpha coupling constants in proteins uniformly enriched with <sup>13</sup>C. *Journal of Biomolecular NMR.* 1992;2(4):401-405.
5. Xia Y, Yee A, Arrowsmith CH, Gao X. <sup>1</sup>HC and <sup>1</sup>HN total NOE correlations in a single 3D NMR experiment. <sup>15</sup>N and <sup>13</sup>C time-sharing in t1 and t2 dimensions for simultaneous data acquisition. *Journal of Biomolecular NMR.* 2003;27(3):193-203.
6. Wishart DS, Sykes BD. Chemical shifts as a tool for structure determination. *Methods Enzymol.* 1994;239:363-392.
7. Sen M, Legge GB. Pactolus I-domain: functional switching of the Rossmann fold. *Proteins.* 2007;68:626-635.
8. Laskowski RA, Rullmannn JA, MacArthur MW, Kaptein R, Thornton JM. AQUA and PROCHECK-NMR: programs for checking the quality of protein structures solved by NMR. *Journal of biomolecular NMR.* 1996;8(4):477-486.
9. Van Der Spoel D, Lindahl E, Hess B, Groenhof G, Mark AE, Berendsen HJ. GROMACS: fast, flexible, and free. *J Comput Chem.* 2005;26(16):1701-1718.
10. Homeyer N, Horn AH, Lanig H, Sticht H. AMBER force-field parameters for phosphorylated amino acids in different protonation states: phosphoserine, phosphothreonine, phosphotyrosine, and phosphohistidine. *J Mol Model.* 2006;12(3):281-289.

Figure S1

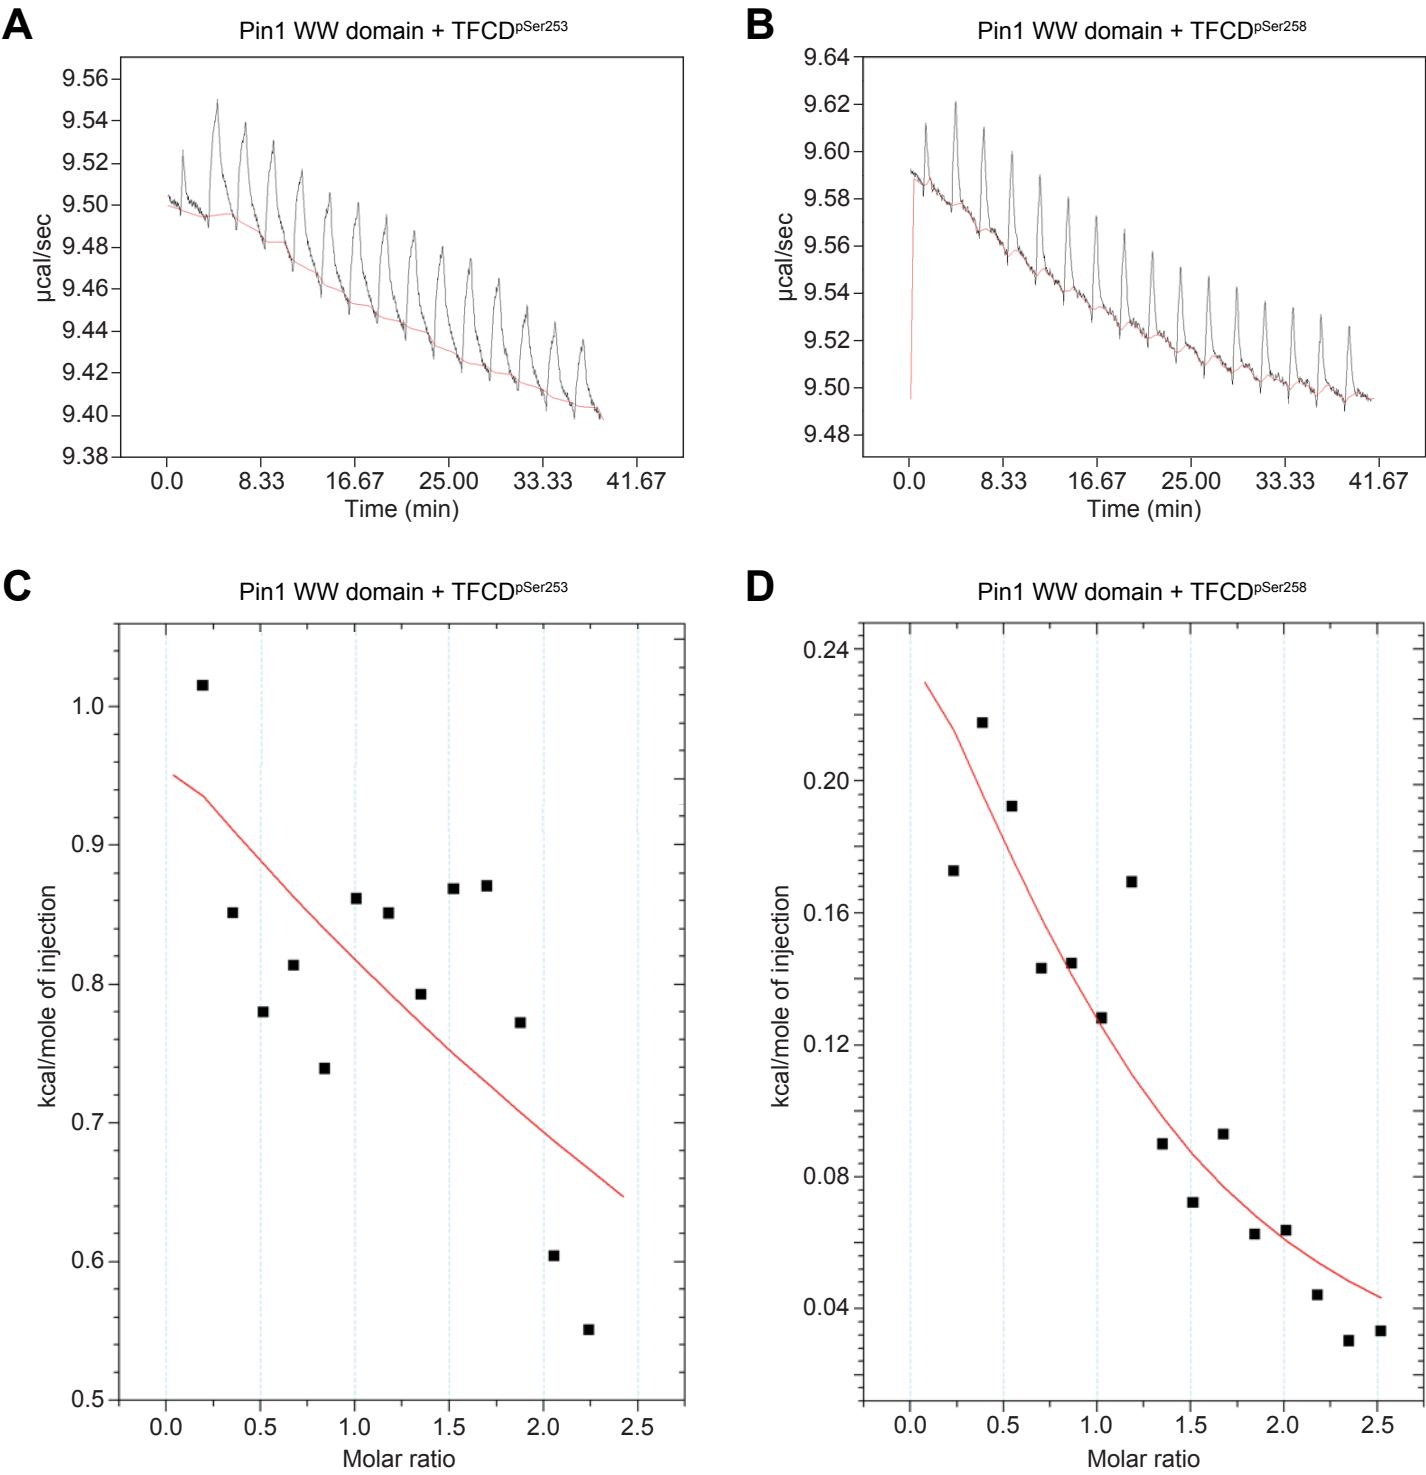

Figure S2

A

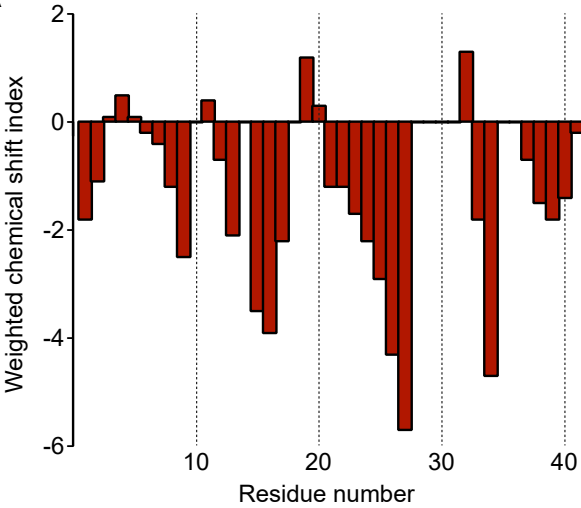

B

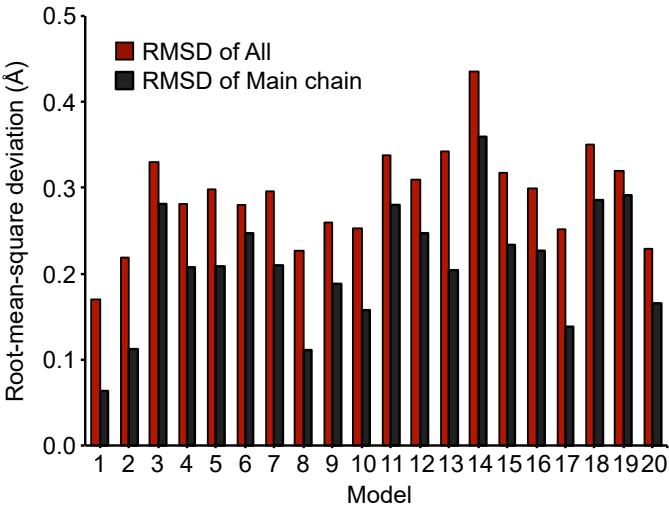

**Table S1:** Summary of the Number of Restraints Used in the Calculations and Structural Statistics for the 20 Final NMR Models.

|                                                           |                    |
|-----------------------------------------------------------|--------------------|
| <b>Restraint Classification</b>                           |                    |
| Total NOE                                                 | 203                |
| Sequential                                                | 56                 |
| Medium Range                                              | 92                 |
| Long Range                                                | 111                |
| Intermolecular                                            | 7                  |
| <b>Total dihedral angle restraints</b>                    |                    |
| PHI ( $\phi$ )                                            | 11                 |
| PSI ( $\psi$ )                                            | 9                  |
| CHI ( $\chi$ )                                            | 8                  |
| <b>Amber Structural Statistics</b>                        |                    |
| Maximum distance restraint violation                      | 0.355              |
| Mean constraint violation energy                          | -1977.61           |
| Maximum dihedral angle violation                          | 13                 |
| Mean dihedral angle violation                             | 3.9                |
| <b>Average pairwise RMSD of NMR ensembles (Å)</b>         |                    |
| All atoms (residues 8-41 [WW]+phosphoSer-Pro motif)       | 1.94               |
| Backbone (residues)                                       | 1.06               |
| <b>Average pairwise RMSD of the minimized complex (Å)</b> |                    |
| All atoms (residues 8-41 [WW]+phosphoSer-Pro motif)       | 0.45               |
| Backbone (residues)                                       | 0.3                |
| <b>PROCHECK statistics</b>                                |                    |
| Most favored (%)                                          | 60.5               |
| Allowed favored (%)                                       | 20.9               |
| Generously allowed (%)                                    | 14.0               |
| Disallowed (%)                                            | 4.7                |
| <b>MolProbity statistics</b>                              |                    |
| Protein Geometry Poor rotamers                            | 68 (7.56%)         |
| Favored rotamers                                          | 765 (85.00%)       |
| Ramachandran outliers                                     | 21 (4.57%)         |
| Ramachandran favored                                      | 391 (85.00%)       |
| C $\beta$ deviations >0.25Å                               | 11 (1.12%)         |
| Bad bonds                                                 | 52 / 8652 (0.60%)  |
| Bad angles                                                | 58 / 11120 (0.52%) |
| Peptide Omegas Cis Prolines                               | 0 / 60 (0.00%)     |

**Table S2:** Sequences of primers used for RT-qPCR.

| <b>Primer</b>          | <b>Sequence (5'-3')</b>       |
|------------------------|-------------------------------|
| human <i>F3</i> for    | CTGCTCGGCTGGGTCTTC            |
| human <i>F3</i> rev    | AATTATATGCTGCCACAGTATTTGTAGTG |
| mouse <i>F3</i> for    | CGAGACACAAACCTTGGACAGC        |
| mouse <i>F3</i> rev    | CGCTTCAGCCTTTCCTCTATGC        |
| human <i>RPLP0</i> for | TCGACAATGGCAGCATCTAC          |
| human <i>RPLP0</i> rev | ATCCGTCTCCACAGACAAGG          |
| mouse <i>Rplp0</i> for | GGACCCGAGAAGACCTCCTT          |
| mouse <i>Rplp0</i> rev | GCACATCACTCAGAATTTCAATGG      |
