# Supplementary material for: Structural and cellular mechanisms of peptidyl-prolyl isomerase Pin1-mediated enhancement of Tissue Factor gene expression, protein half-life, and pro-coagulant activity
Source: PubMed Central journal article supplement — Haematologica. 2018 Mar 15;103(6):1073–82. doi: 10.3324/haematol.2017.183087 (PMC6058786; doi:10.3324/haematol.2017.183087), 2018-06
Supplement: 2017_183087-Disclosures_and_Contributions.pdf [file 2017_183087-Disclosures_and_Contributions.pdf]

Haematologica  
HAEMATOL/2017/183087  
Version 3

Structural and cellular mechanisms of peptidyl-prolyl isomerase  
Pin1-mediated enhancement of Tissue Factor gene expression, protein  
half-life, and pro-coagulant activity

Kondababu Kurakula, Duco S. Koenis, Mark A. Herzik, Yanyun Liu,  
John W. Craft, Pieter B. van Loenen, Mariska Vos, M. Khang Tran,  
Henri H. Versteeg, Marie-José T.H. Goumans, Wolfram Ruf, Carlie J.M.  
de Vries, and Mehmet en

Disclosures: This work was supported by the research program of the BioMedical Materials institute, co-funded by the Dutch Ministry of Economic Affairs as a part of Project P1.02 NEXTEAM. This work was also supported by the Rembrandt Institute for Cardiovascular Research (RICS-grant 2013), the Netherlands CardioVascular Research Initiative (CVON: 2012-08), and the National Institute of Health (grants HL-60742 and P01-HL16411). We would like to thank Dr. Youlin Xia and the UH NMR facility-DOR for NMR data acquisition, CACDS for the structure calculations, and Amr Elnashai, Amy Sater, and Glen Legge for their support of this research.

Contributions: K.K., C.J.M.d.V., and M.S. conceived the study and experiments. K.K., D.S.K., M.A.H.Jr., Y.L., J.W.C., P.B.v.L., M.V., and M.K.T. performed experiments. K.K., D.S.K., M.A.H.Jr., C.J.M.d.V., and M.S. wrote the manuscript. H.H.V., M.G., and W.R. provided expertise and feedback.
